# Supplementary material for: An Intracellular Nanotrap Redirects Proteins and Organelles in Live Bacteria
Source: PubMed Central journal article supplement — mBio. 2015 Jan 13;6(1):e02117-14. doi: 10.1128/mBio.02117-14 (PMC4313912; doi:10.1128/mbio.02117-14), 2015-01-13
Supplement: mbo001152121sf1.pdf [file mbo001152121sf1.pdf]

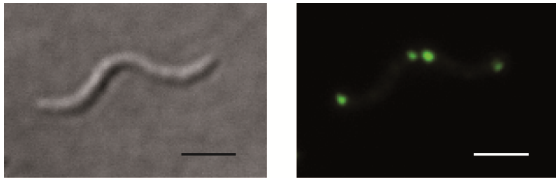

**Supplementary Fig. S1:** CheW<sub>1</sub>-EGFP localization in a dividing cell. Representative DIC and fluorescence micrograph of a cell chromosomally expressing CheW<sub>1</sub>-EGFP close to cell division. CheW<sub>1</sub>-EGFP localizes distinctly at the cell poles and forms two new foci at mid-cell at the expected position of septum formation. Scale bar 2  $\mu$ m.
