# Supplementary material for: An Intracellular Nanotrap Redirects Proteins and Organelles in Live Bacteria
Source: PubMed Central journal article supplement — mBio. 2015 Jan 13;6(1):e02117-14. doi: 10.1128/mBio.02117-14 (PMC4313912; doi:10.1128/mbio.02117-14), 2015-01-13
Supplement: mbo001152121sf2.pdf [file mbo001152121sf2.pdf]

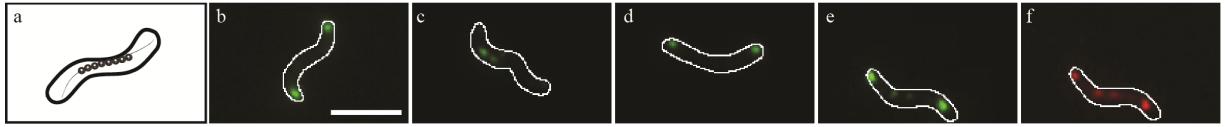

**Supplementary Fig. S2:** Schematics (a) and fluorescence micrograph of *M. gryphiswaldense*  $\Delta mamM$  mutant cells expressing CheW<sub>1</sub>-EGFP alone (b) or in combination with MamC-2xGBP (c) and wild type cells expressing chromosomal CheW<sub>1</sub>-EGFP and cytoplasmic GBP (d), or CheW<sub>1</sub>-EGFP and MamC-mCherry-GBP (e,f). Scale bar 2  $\mu\text{m}$ .
