# Supplementary material for: An Intracellular Nanotrap Redirects Proteins and Organelles in Live Bacteria
Source: PubMed Central journal article supplement — mBio. 2015 Jan 13;6(1):e02117-14. doi: 10.1128/mBio.02117-14 (PMC4313912; doi:10.1128/mbio.02117-14), 2015-01-13
Supplement: mbo001152121sf3.pdf [file mbo001152121sf3.pdf]

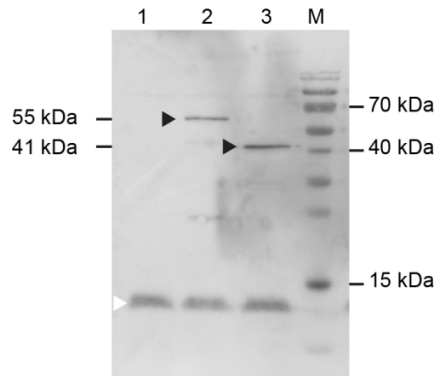

**Supplementary Fig. S3:** Western blot of *M. gryphiswaldense* cells expressing CheW<sub>1</sub>-EGFP (1), CheW<sub>1</sub>-EGFP MamC-mCherry-GBP (55.43 kDa) (2) and CheW<sub>1</sub>-EGFP MamC-2xGBP (41.07 kDa), protein bands are indicated by black arrow heads (3). The native MamC (12.35 kDa) is present in all strains, indicated by white arrow head. Additional bands are visible for all strains expressing MamC fusions proving stable expression. MamC was detected using rabbit  $\alpha$ MamC IgG as primary, and goat anti-rabbit IgG alkaline phosphatase antibodies as secondary antibody. PageRuler™ Prestained Protein Ladder from fermentas was used as a standard.
