# Supplementary material for: An Intracellular Nanotrap Redirects Proteins and Organelles in Live Bacteria
Source: PubMed Central journal article supplement — mBio. 2015 Jan 13;6(1):e02117-14. doi: 10.1128/mBio.02117-14 (PMC4313912; doi:10.1128/mbio.02117-14), 2015-01-13
Supplement: mbo001152121sf5.pdf [file mbo001152121sf5.pdf]

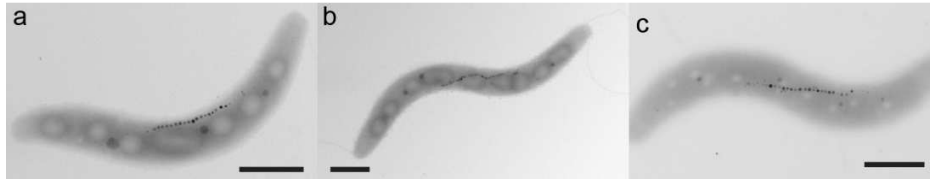

**Supplementary Fig. S5:** TEM micrographs of *M. gryphiswaldense*  $\Delta cheW_1$  (a) and cells expressing CheW<sub>1</sub>-EGFP and cytoplasmic MagGBP (b) or CheW<sub>1</sub>-EGFP and MamC-mCherry-GBP (c). Scale bar 1  $\mu$ m.
