# Supplementary material for: An Intracellular Nanotrap Redirects Proteins and Organelles in Live Bacteria
Source: PubMed Central journal article supplement — mBio. 2015 Jan 13;6(1):e02117-14. doi: 10.1128/mBio.02117-14 (PMC4313912; doi:10.1128/mbio.02117-14), 2015-01-13
Supplement: mbo001152121st1.pdf [file mbo001152121st1.pdf]

**Supplementary Table S1: Plasmids used in this study**

| <b>Plasmid name</b> | <b>Description</b>                                                                                                    | <b>Source or reference</b>                          |
|---------------------|-----------------------------------------------------------------------------------------------------------------------|-----------------------------------------------------|
| pJET1.2/blunt       | Cloning vector; Amp <sup>R</sup>                                                                                      | Fermentas, Schwerte                                 |
| pBBR-MCS2           | Mobilizable broad-host-range vector; Km <sup>R</sup>                                                                  | M. E. Kovach, <i>et al.</i> , 1995                  |
| pBAM1               | Km <sup>R</sup> , Amp <sup>R</sup> , oriR6K, <i>tnpA</i>                                                              | E. Martinez-Garcia, <i>et al.</i> , 2011            |
| pORFM               | pK19mobGII, universal in-frame deletion/in-frame fusion vector with GalK-based counterselection and MCS               | O. Raschdorf and F. Müller, 2014                    |
| pMA-T GBPOpt        | Amp <sup>R</sup> , ColE1 ori, <i>maggbp</i>                                                                           | GeneArt® (Invitrogen), life technologies, Darmstadt |
| pGH-Trpl GBP        | Amp <sup>R</sup> , <i>maggbp-gbp-maggbp</i>                                                                           | ATG:biosynthetics, Merzhausen                       |
| pSB6                | pBAM1 with P <sub>mamDC45</sub> , <i>magegfp</i> , Km <sup>R</sup> , Amp <sup>R</sup>                                 | S. Borg, <i>et al.</i> , 2014                       |
| pSB7                | pBAM1 with P <sub>tet</sub> , <i>magegfp</i> , P <sub>Neo</sub> -TetR, Km <sup>R</sup> , Amp <sup>R</sup>             | S. Borg, <i>et al.</i> , 2014                       |
| pFP66               | fusion of <i>cheW<sub>I</sub>-egfp-cheW<sub>I</sub></i> downstream fragment inserted into pORFM                       | this study                                          |
| pJH01               | pAP150 with P <sub>mamDC45</sub> , <i>cheW<sub>I</sub>-egfp</i> , Km <sup>R</sup>                                     | this study                                          |
| pJH16               | pBAM1 with P <sub>mamDC45</sub> , <i>mamC-maggbp</i> , Km <sup>R</sup> , Amp <sup>R</sup>                             | this study                                          |
| pJH17               | pBAM1 with P <sub>tet</sub> , <i>mamC-maggbp</i> , P <sub>Neo</sub> -TetR, Km <sup>R</sup> , Amp <sup>R</sup>         | this study                                          |
| pJH39               | pBAM1 with P <sub>mamDC45</sub> , <i>mamC-maggbp-gbp</i> , Km <sup>R</sup> , Amp <sup>R</sup>                         | this study                                          |
| pJH40               | pBAM1 with P <sub>tet</sub> , <i>mamC-maggbp-gbp</i> , P <sub>Neo</sub> -TetR, Km <sup>R</sup> , Amp <sup>R</sup>     | this study                                          |
| pJH60               | pBAM1 with P <sub>mamDC45</sub> , <i>mamC-mCherry-maggbp</i> , Km <sup>R</sup> , Amp <sup>R</sup>                     | this study                                          |
| pJH61               | pBAM1 with P <sub>tet</sub> , <i>mamC-mCherry-maggbp</i> , P <sub>Neo</sub> -TetR, Km <sup>R</sup> , Amp <sup>R</sup> | this study                                          |
| pJH97               | pBAM1 with P <sub>mamDC45</sub> , <i>mamC-maggbp-gbp-maggbp</i> , Km <sup>R</sup> , Amp <sup>R</sup>                  | this study                                          |
| pJH100              | pORFM with fused up- and downstream region of <i>cheW<sub>I</sub></i> for deletion of <i>cheW<sub>I</sub></i>         | this study                                          |
| pJH104              | pBAM1 with P <sub>mamDC45</sub> , <i>maggbp</i> , Km <sup>R</sup> , Amp <sup>R</sup>                                  | this study                                          |
