# Supplementary material for: An Intracellular Nanotrap Redirects Proteins and Organelles in Live Bacteria
Source: PubMed Central journal article supplement — mBio. 2015 Jan 13;6(1):e02117-14. doi: 10.1128/mBio.02117-14 (PMC4313912; doi:10.1128/mbio.02117-14), 2015-01-13
Supplement: mbo001152121st2.pdf [file mbo001152121st2.pdf]

**Supplementary Table S2: Strains used in this study**

| <b>Strain</b>                                                       | <b>Description</b>                                                                                                                                                                                                  | <b>Source or reference</b>                |
|---------------------------------------------------------------------|---------------------------------------------------------------------------------------------------------------------------------------------------------------------------------------------------------------------|-------------------------------------------|
| <b><i>Escherichia coli</i></b>                                      |                                                                                                                                                                                                                     |                                           |
| DH5 $\alpha$                                                        | F <sup>+</sup> <i>supE44</i> $\Delta$ <i>lacU169</i> ( $\Phi$ 80<br><i>lacZDM15</i> ) <i>hsdR17</i> <i>recA1</i><br><i>endA1</i>                                                                                    | Invitrogen, life technologies, Darmstadt  |
| WM3064                                                              | <i>gyrA96</i> <i>thi-1</i> <i>relA1</i><br><i>thrB1004</i> <i>pro</i> <i>thi</i> <i>rpsL</i><br><i>hsdS</i> <i>lacZAM15</i> <i>RP4-1360</i><br>$\Delta$ ( <i>araBAD</i> )567<br>$\Delta$ <i>dapA1341::[erm pir]</i> | W. Metcalf, unpublished                   |
| BW29427                                                             | DAP auxotroph derivative of <i>E. coli</i> strain B2155                                                                                                                                                             | K. Datsenko and B. L. Wanner, unpublished |
| <b><i>Magnetospirillum gryphiswaldense</i></b>                      |                                                                                                                                                                                                                     |                                           |
| <i>M. gryphiswaldense</i> MSR-1 R3/S1                               | Rif <sup>R</sup> , Sm <sup>R</sup> spontaneous mutant, lab strain                                                                                                                                                   | D. Schultheiss, <i>et al.</i> , 2003      |
| <i>M. gryphiswaldense</i> $\Delta$ <i>mamJ</i>                      | $\Delta$ <i>mamJ</i>                                                                                                                                                                                                | A. Scheffel, <i>et al.</i> , 2006         |
| <i>M. gryphiswaldense</i> $\Delta$ <i>mamM</i>                      | $\Delta$ <i>mamM</i>                                                                                                                                                                                                | R. Uebe, <i>et al.</i> , 2011             |
| <i>M. gryphiswaldense</i> $\Delta$ <i>cheW</i> <sub>1</sub>         | $\Delta$ <i>cheW</i> <sub>1</sub>                                                                                                                                                                                   | this study                                |
| <i>M. gryphiswaldense</i> MSR-1 FP66                                | in frame fusion of <i>egfp</i> to <i>cheW</i> <sub>1</sub>                                                                                                                                                          | this study                                |
| <i>M. gryphiswaldense</i> $\Delta$ <i>cheW</i> <sub>1</sub> (pJH01) | $\Delta$ <i>cheW</i> <sub>1</sub> complemented with p JH01                                                                                                                                                          | this study                                |
| <i>M. gryphiswaldense</i> MSR-1 JH5                                 | FP66 transposon mutant with inserted <i>maggbp</i> from P <sub>mamDC45</sub> , Km <sup>R</sup>                                                                                                                      | this study                                |
| <i>M. gryphiswaldense</i> MSR-1 JH6                                 | FP66 transposon mutant with inserted <i>mamC-maggbp</i> from P <sub>mamDC45</sub> , Km <sup>R</sup>                                                                                                                 | this study                                |
| <i>M. gryphiswaldense</i> MSR-1 JH7                                 | FP66 transposon mutant with inserted <i>mamC-maggbp-gbp</i> from P <sub>mamDC45</sub> , Km <sup>R</sup>                                                                                                             | this study                                |
| <i>M. gryphiswaldense</i> MSR-1 JH8                                 | FP66 transposon mutant with inserted <i>mamC-mCherry-maggbp</i> from P <sub>tet</sub> , Km <sup>R</sup>                                                                                                             | this study                                |
| <i>M. gryphiswaldense</i> MSR-1 JH9                                 | FP66 transposon mutant with inserted <i>mamC-maggbp-gbp</i> from P <sub>tet</sub> , Km <sup>R</sup>                                                                                                                 | this study                                |

|                                      |                                                                                                            |            |
|--------------------------------------|------------------------------------------------------------------------------------------------------------|------------|
| <i>M. gryphiswaldense</i> MSR-1 JH10 | FP66 transposon mutant with inserted <i>mamC-maggbp-gbp-maggbp</i> from P <sub>tet</sub> , Km <sup>R</sup> | this study |
| <i>M. gryphiswaldense</i> MSR-1 JH11 | $\Delta$ <i>mamJ</i> with inframe fusion of <i>egfp</i> to <i>cheW<sub>1</sub></i>                         | this study |
| <i>M. gryphiswaldense</i> MSR-1 JH12 | JH11 transposon mutant with inserted <i>mamC-maggbp</i> from P <sub>mamDC45</sub> , Km <sup>R</sup>        | this study |
| <i>M. gryphiswaldense</i> MSR-1 JH13 | $\Delta$ <i>mamM</i> with inframe fusion of <i>egfp</i> to <i>cheW<sub>1</sub></i>                         | this study |
| <i>M. gryphiswaldense</i> MSR-1 JH14 | JH13 transposon mutant with inserted <i>mamC-maggbp-gbp</i> from P <sub>mamDC45</sub> , Km <sup>R</sup>    | this study |

---
